# Supplementary material for: A water-soluble glucose-appended quinoline–benzothiazole conjugate as a selective and sensitive receptor for Cu+ ions in aqueous media and intracellular bio-imaging in live cells
Source: Royal Society of Chemistry journal article supplement (doi:10.1039/d5an00066a), 2025-01-01
Supplement: d5an00066a1.pdf [file d5an00066a1.pdf]

## Supporting Information

### **Water soluble glucose-appended quinoline-benzothiazole conjugate as a selective and sensitive receptor for Cu<sup>+</sup> ion in aqueous media and intracellular bio-imaging in live cells**

Ravinkumar Valand<sup>a</sup>, Nidhi Pandey<sup>b</sup>, Jaysh Ballare<sup>b</sup> and Areti Sivaiah<sup>\*a</sup>

---

<sup>a</sup> Department of Chemistry, Sardar Vallabhbhai National Institute of Technology, Surat-395007, Gujarat, India. E-mail: [aretis@chem.svnit.ac.in](mailto:aretis@chem.svnit.ac.in)

<sup>b</sup> Department of Chemical Engineering, Indian Institute of Technology Bombay, Powai-400076, Mumbai, India

---

**Corresponding author: Areti Sivaiah\***-Department of Chemistry, Sardar Vallabhbhai National Institute of Technology, Surat-395007, Gujarat, India: Email: [aretis@chem.svnit.ac.in](mailto:aretis@chem.svnit.ac.in)

| <b>Table of Contents</b>                                                                                             | <b>Page no</b> |
|----------------------------------------------------------------------------------------------------------------------|----------------|
| <b>S1.</b> Synthesis and characterization of compound <b>P<sub>2</sub></b>                                           | <b>03</b>      |
| <b>S2.</b> Synthesis and characterization of compound <b>P<sub>3</sub></b>                                           | <b>04</b>      |
| <b>S3.</b> Synthesis and characterization of compound <b>P<sub>5</sub></b>                                           | <b>06</b>      |
| <b>S4.</b> Characterization of compound <b>P<sub>6</sub></b>                                                         | <b>08</b>      |
| <b>S5.</b> Characterization of compound <b>L</b>                                                                     | <b>09</b>      |
| <b>S6.</b> Solubility of probe <b>L</b> in water                                                                     | <b>11</b>      |
| <b>S7.</b> Effect of absorbance and fluorescence on probe <b>L</b> using<br>different metal ions                     | <b>11</b>      |
| <b>S8.</b> Fluorescence spectra of <b>L</b> with different metal ions                                                | <b>12</b>      |
| <b>S9.</b> Association constant obtained from the fluorescence titration of<br>{ <b>L+Cu<sup>+</sup></b> } complex   | <b>13</b>      |
| <b>S10.</b> Determination of limit of detection (LOD) of <b>Cu<sup>+</sup></b> by <b>L</b>                           | <b>13</b>      |
| <b>S11.</b> Fluorescence quantum yield of <b>L</b> and { <b>L+Cu<sup>+</sup></b> } complex                           | <b>13</b>      |
| <b>S12.</b> <b>Table 1:</b> Comparisons between <b>L</b> and the molecular probe were reported<br>in the literature. | <b>14</b>      |
| <b>S13.</b> Reversibility experiments of <b>L</b> with <b>Cu<sup>+</sup></b>                                         | <b>16</b>      |
| <b>S14.</b> Optimized structure of <b>L</b> and { <b>L+ Cu<sup>+</sup></b> }                                         | <b>17</b>      |
| <b>Table S2.</b> Cartesian coordination of optimized <b>L</b>                                                        | <b>17</b>      |
| <b>Table S3.</b> Cartesian coordinates of optimized { <b>L+ Cu<sup>+</sup></b> }                                     | <b>18</b>      |
| <b>S15.</b> Effect of pH on the Fluorescence emission of <b>L</b> and { <b>L+ Cu<sup>+</sup></b> }                   | <b>18</b>      |
| <b>References</b>                                                                                                    | <b>19</b>      |

## S 01. Synthesis and characterization of compound P<sub>2</sub>

The P<sub>2</sub> has been synthesized by a producer in the reported literature<sup>1</sup>. In a dry 100 mL round bottom flask, 8-hydroxyquinoline 2-carboxaldehyde (2 g, 11 mmol) and potassium carbonate (2.4 g, 17.3 mmol) were dissolved in *N,N*-dimethylformamide (DMF) and stirred for 5 minutes. Subsequently, a solution of propargyl bromide (1.3 mL, 17.3 mmol) was added dropwise to the reaction mixture. The resulting mixture was stirred at room temperature overnight. Upon completion of the reaction, the mixture was separated using ethyl acetate and water. The organic layer was extracted with ethyl acetate, dried over anhydrous sodium sulfate (Na<sub>2</sub>SO<sub>4</sub>), and concentrated under a vacuum. The crude product was then purified by column chromatography to yield a brown precipitate (1.94 g, Yield= 80 %) <sup>1</sup>H NMR (CDCl<sub>3</sub>, 600 MHz): δ 10.29 (s, 1H), 8.27 (d, *J*=8.46 Hz, 1H), 8.05 (d, *J*=8.45 Hz, 1H), 7.51 (d, *J*=8.15 Hz, 1H), 7.35 (d, *J*=7.74 Hz, 1H), 5.08 (d, *J*=2.31 Hz, 2H), 2.57 (t, *J*=2.30 Hz, 1H) <sup>13</sup>C NMR (CDCl<sub>3</sub>, 150 MHz): δ 193.99, 154.12, 151.96, 140.43, 137.69, 131.73, 129.78, 121.01, 118.28, 111.39, 78.17, 76.95, 57.23

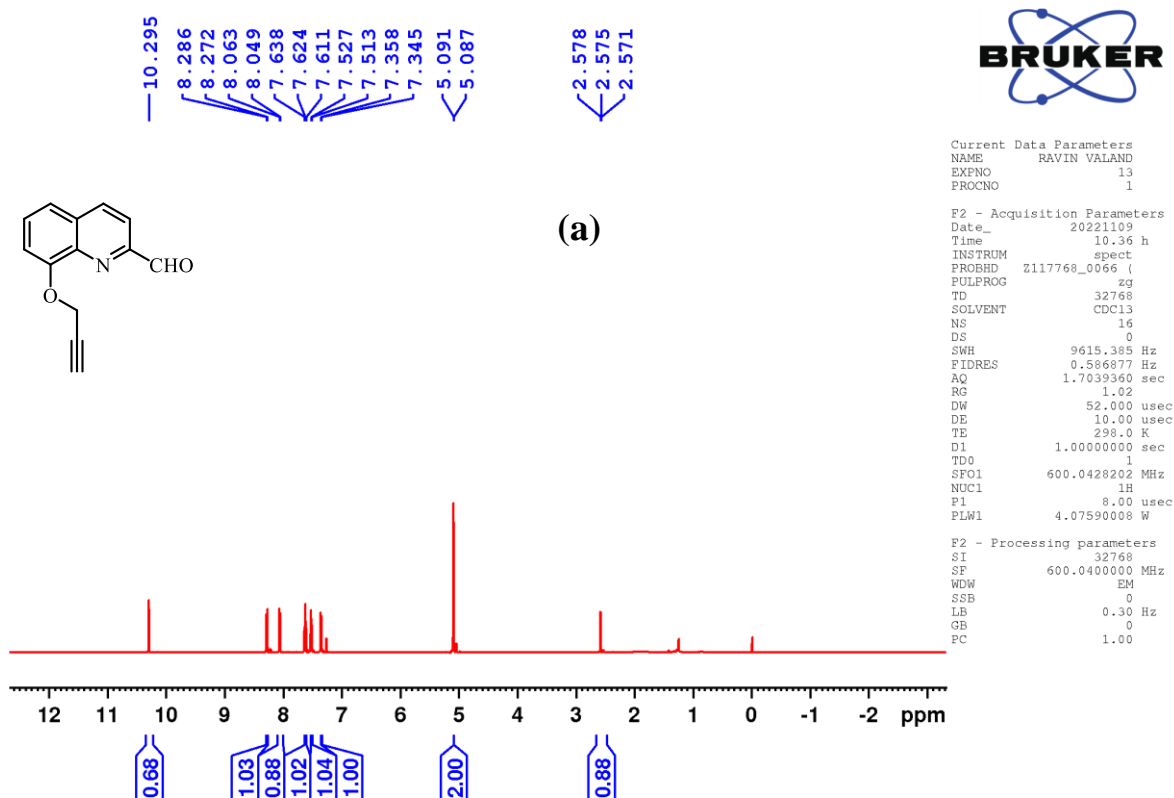

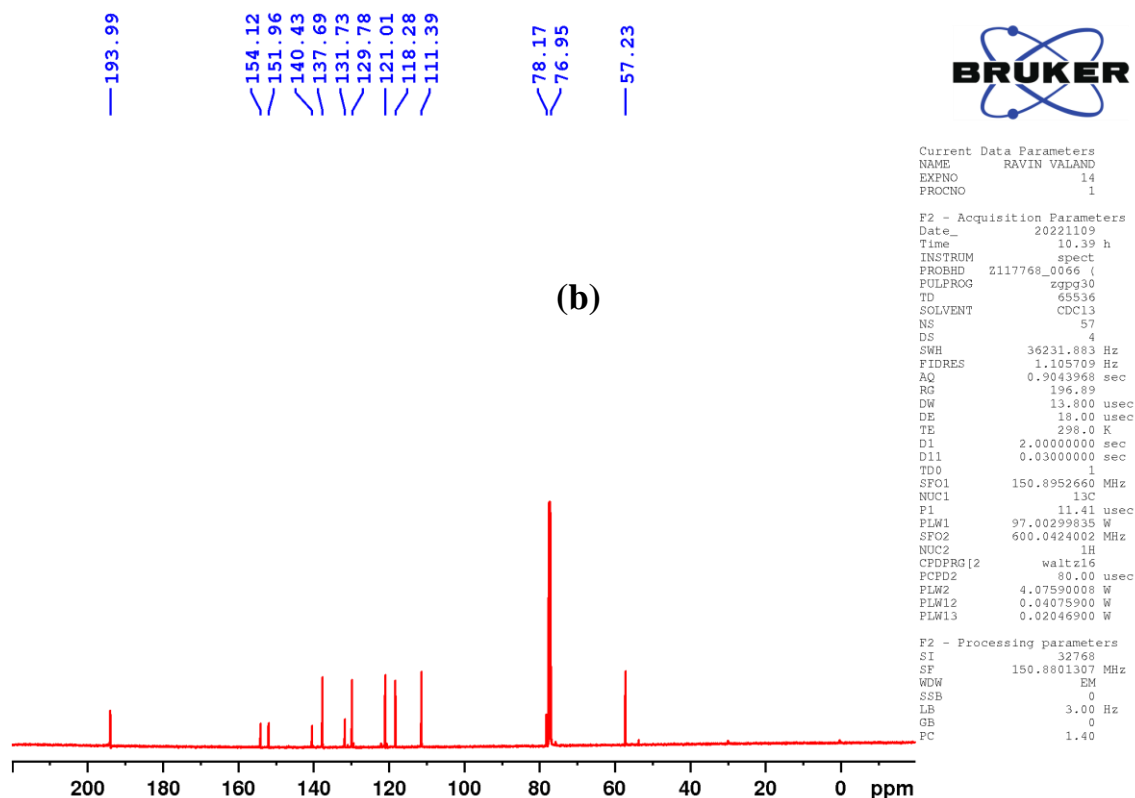

**Fig. S1.** Spectrum of compound **P<sub>2</sub>** in CDCl<sub>3</sub> (a) <sup>1</sup>H NMR (b) <sup>13</sup>C NMR

## S2. Synthesis and characterization of compound **P<sub>3</sub>**

**P<sub>2</sub>** (1 g, 4.7 mmol) and 2-aminobenzene-1-thiol (608 μL, 5.6 mmol) were dissolved in DMSO and stirred at 120 °C for 2 hours. The reaction mixture cooled to room temperature and poured in water. The crude product was extracted with ethyl acetate and washed with water. The Organic layer was dried over anhydrous sodium sulfate and concentrate under vacuum. The crude product was then purified by silica gel column chromatography using a 4:6 mixture of Ethyl acetate and petroleum ether. The pure fraction was collected and evaporated to yield the product (1.12 g, Yield= 75 %) <sup>1</sup>H NMR (CDCl<sub>3</sub>, 400 MHz): δ 8.50 (d, *J*=8.57 Hz, 1H), 8.28 (d, *J*= 7.59 Hz, 1H), 8.13 (d, *J*=8.16 Hz, 1H), 7.98 (d, *J*=7.86 Hz, 1H), 7.54-7.50 (m, 1H), 7.45-7.42 (m, 1H), 7.33 (m, 1H) <sup>13</sup>C NMR (CDCl<sub>3</sub>, 100 MHz): δ 170.31, 154.73, 153.72, 150.66, 140.71, 137.46, 136.91, 130.67, 128.06, 126.59, 126.18, 124.09, 122.38, 121.57, 119.10, 113.51, 78.93, 76.49, 58.22 **ESI-MS**: calcd. for C<sub>19</sub>H<sub>12</sub>N<sub>2</sub>OSH<sup>+</sup>[M+H]<sup>+</sup> 316.0670, found 317.0748

8.298  
8.277  
8.142  
8.122  
7.996  
7.976  
7.553  
7.543  
7.540  
7.532  
7.530  
7.525  
7.520  
7.509  
7.505  
7.502  
7.461  
7.458  
7.440  
7.423  
7.420  
7.361  
7.350  
7.339  
7.328  
7.317  
5.163  
5.157  
2.586  
2.580  
2.574

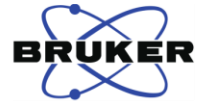

Current Data Parameters  
NAME SRK-AS-03-1H  
EXPNO 10  
PROCNO 1

F2 - Acquisition Parameters  
Date\_ 20230413  
Time 19.20 h  
INSTRUM Avance Neo 400  
PROBHD Z163739\_0226 ( )  
PULPROG zg30  
TD 51724  
SOLVENT CDC13  
NS 18  
DS 0  
SWH 8620.689 Hz  
FIDRES 0.333334 Hz  
AQ 2.9999919 sec  
RG 101  
DW 58.000 usec  
DE 13.14 usec  
TE 297.7 K  
D1 1.00000000 sec  
TD0 1  
SFO1 400.1324708 MHz  
NUC1 1H  
P0 2.67 usec  
P1 8.00 usec  
PLW1 25.07999992 W

F2 - Processing parameters  
SI 65536  
SF 400.1300100 MHz  
WDW EM  
SSB 0  
LB 0.30 Hz  
GB 0  
PC 1.00

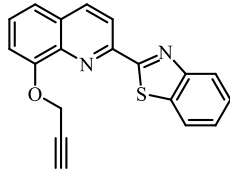

(a)

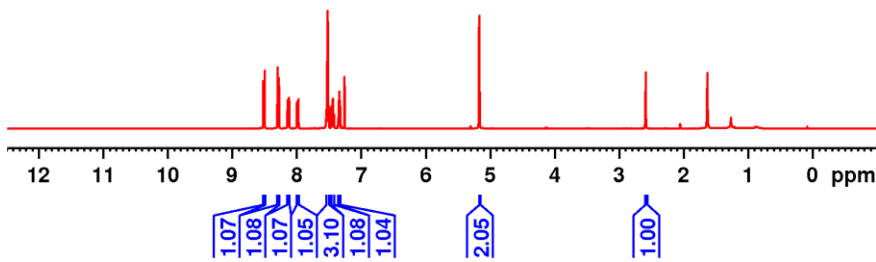

170.31  
154.74  
153.73  
150.60  
140.72  
137.46  
136.91  
130.67  
128.06  
126.60  
126.19  
124.10  
122.39  
121.58  
119.11  
113.51  
78.94  
76.50  
58.23

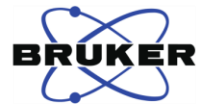

Current Data Parameters  
NAME SRK-AS-03-13C  
EXPNO 12  
PROCNO 1

F2 - Acquisition Parameters  
Date\_ 20230413  
Time 19.27 h  
INSTRUM Avance Neo 400  
PROBHD Z163739\_0226 ( )  
PULPROG zgpg30  
TD 65536  
SOLVENT CDC13  
NS 200  
DS 0  
SWH 27777.777 Hz  
FIDRES 0.847710 Hz  
AQ 1.1796480 sec  
RG 101  
DW 18.000 usec  
DE 6.50 usec  
TE 298.3 K  
D1 1.00000000 sec  
D11 0.03000000 sec  
TD0 1  
SFO1 100.6242384 MHz  
NUC1 13C  
P0 2.67 usec  
P1 8.00 usec  
PLM1 99.3399634 W  
SFO2 400.1316005 MHz  
NUC2 1H  
CPDPRG2 waltz65  
PCPD2 90.00 usec  
PLW2 25.07999992 W  
PLW12 0.19815999 W  
PLW13 0.09967500 W

F2 - Processing parameters  
SI 32768  
SF 100.6127356 MHz  
WDW EM  
SSB 0  
LB 1.00 Hz  
GB 0  
PC 1.40

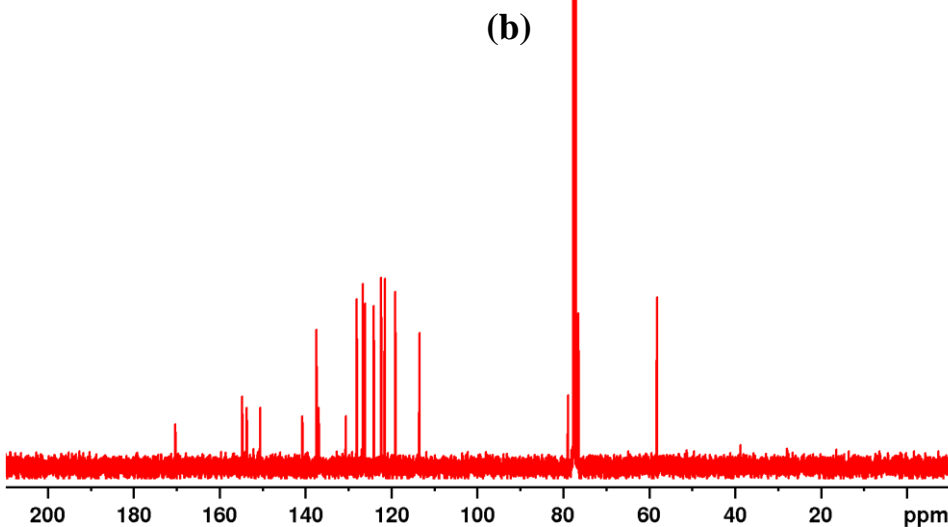

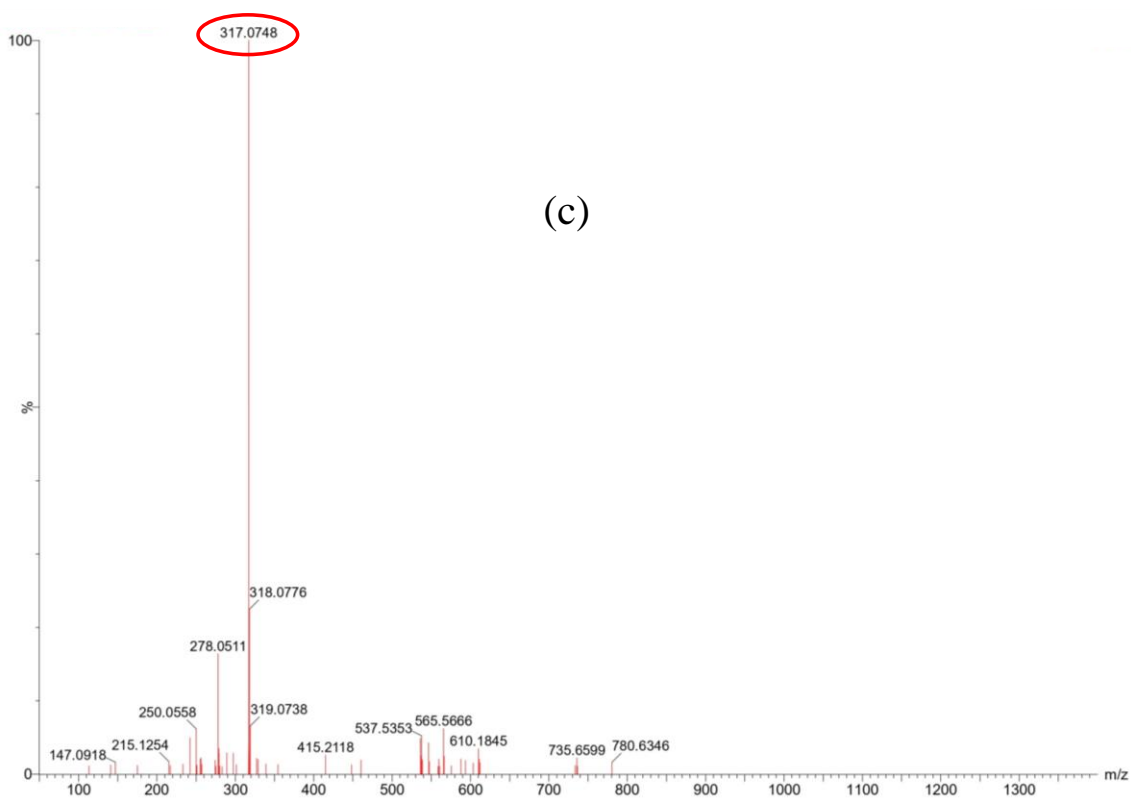

**Fig. S2.** (a)  $^1\text{H}$  NMR ( $\text{CDCl}_3$ ), (b)  $^{13}\text{C}$  NMR ( $\text{CDCl}_3$ ) and (c) ESI-MS spectrum of compound **P<sub>3</sub>**

### S3. Synthesis and Characterization of Compound **P<sub>5</sub>**

The **P<sub>5</sub>** has been synthesized by a producer in the reported literature<sup>2</sup>. The final yield was 61% resulting in off-white crystal.  **$^1\text{H}$  NMR ( $\text{CDCl}_3$ , 600 MHz):**  $\delta$  5.15 (t,  $J=9.50$  Hz, 1 H), 5.04 (t,  $J=9.70$  Hz, 1H), 4.89 (t,  $J=9.20$  Hz, 1H), 4.60 (d,  $J=8.90$  Hz, 1H), 4.21 (dd,  $J=12.40$  Hz,  $J=4.45$  Hz, 1H), 4.10 (d,  $J=12.40$  Hz, 1H), 3.74 (dd,  $J=9.96$  Hz, 1H), 2.03 (s, 3H), 2.01 (s, 3H), 1.96 (s, 3H), 1.94 (s, 3H)  **$^{13}\text{C}$  NMR ( $\text{CDCl}_3$ , 150 MHz):**  $\delta$  170.82, 170.33, 169.54, 169.43, 88.11, 74.24, 72.82, 70.86, 68.12, 61.89, 20.92, 20.78, 20.76

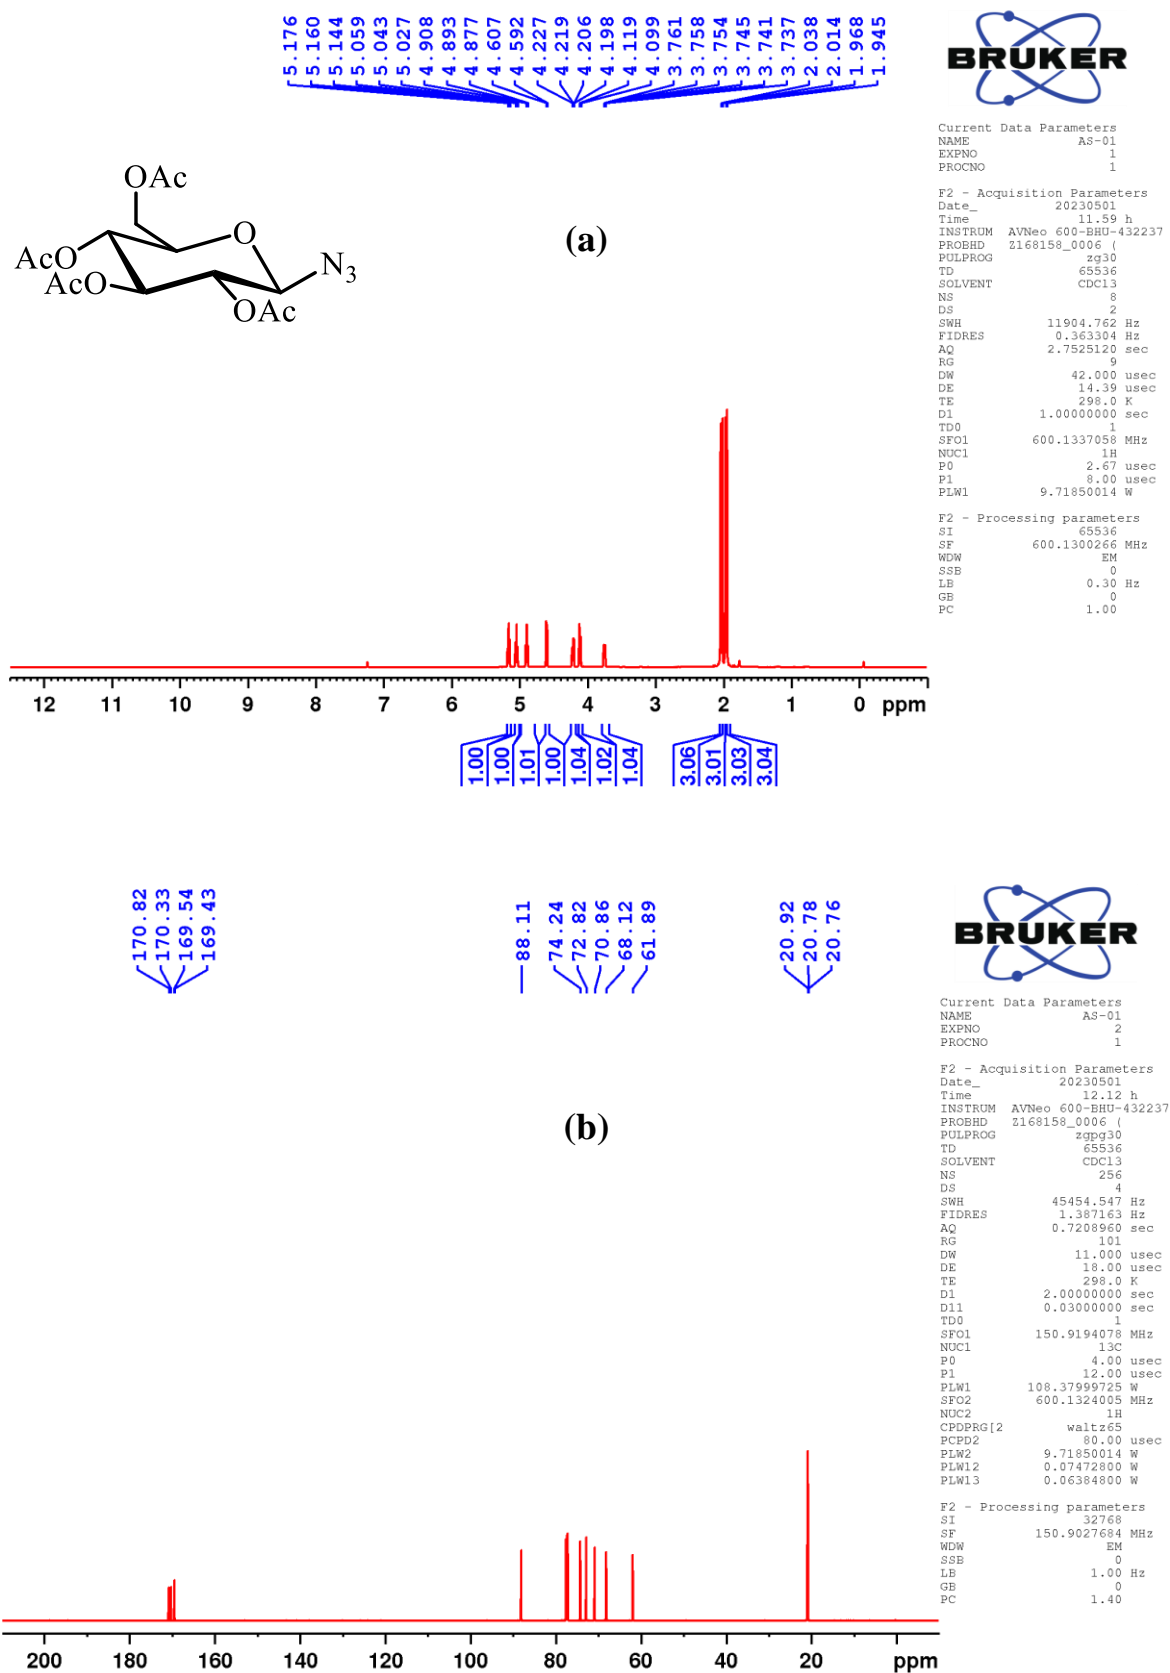

**Fig. S3.** Spectrum of compound **P5** in  $\text{CDCl}_3$  (a)  $^1\text{H}$  NMR and (b)  $^{13}\text{C}$  NMR

## S4. Characterization of compound P<sub>6</sub>

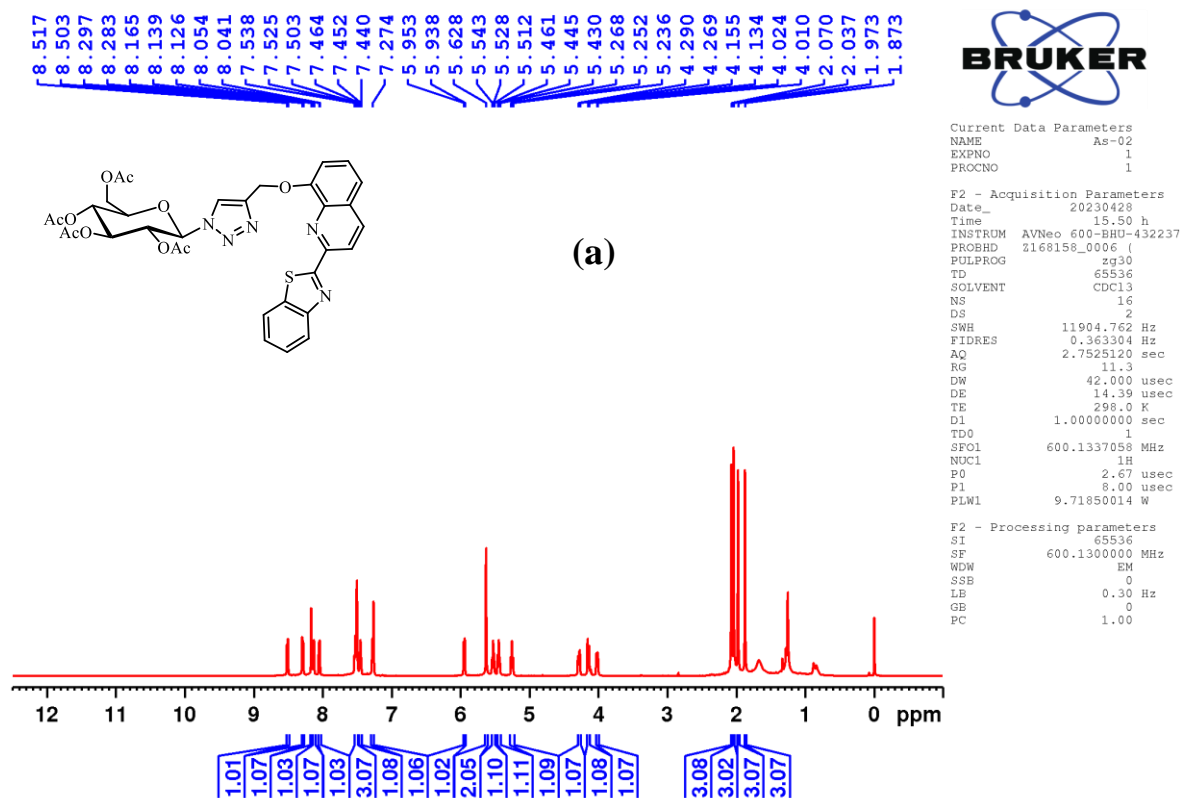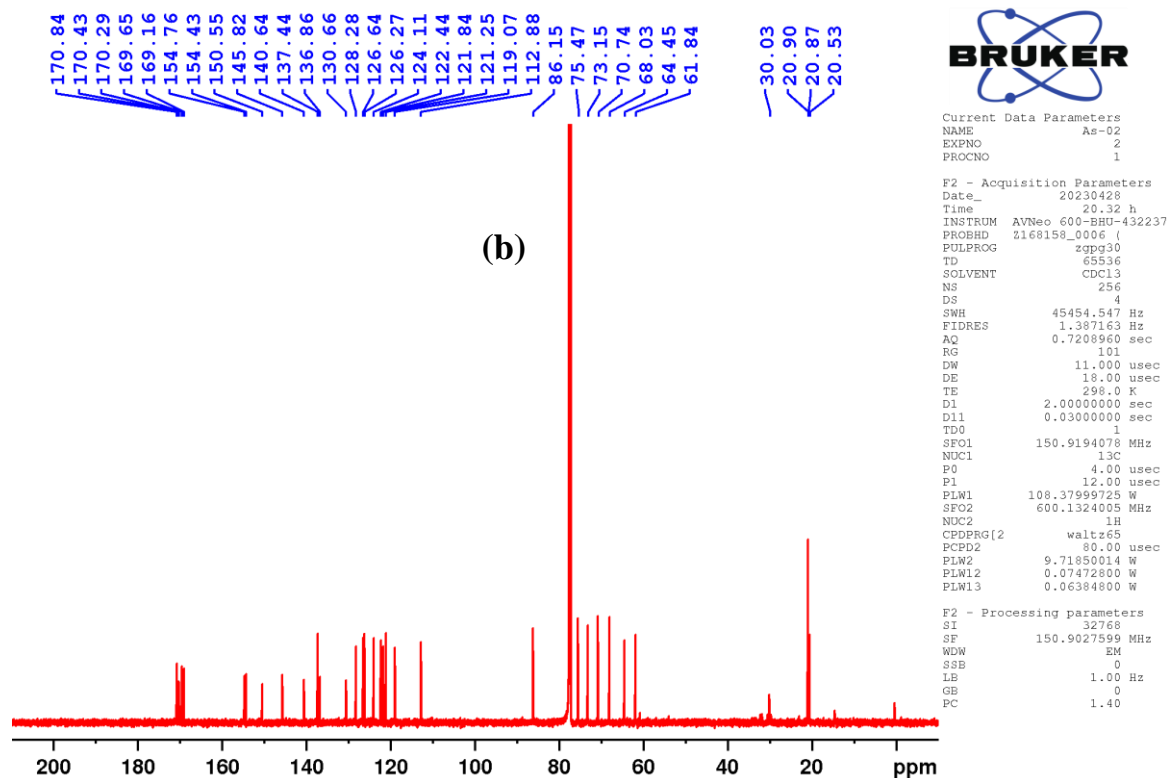



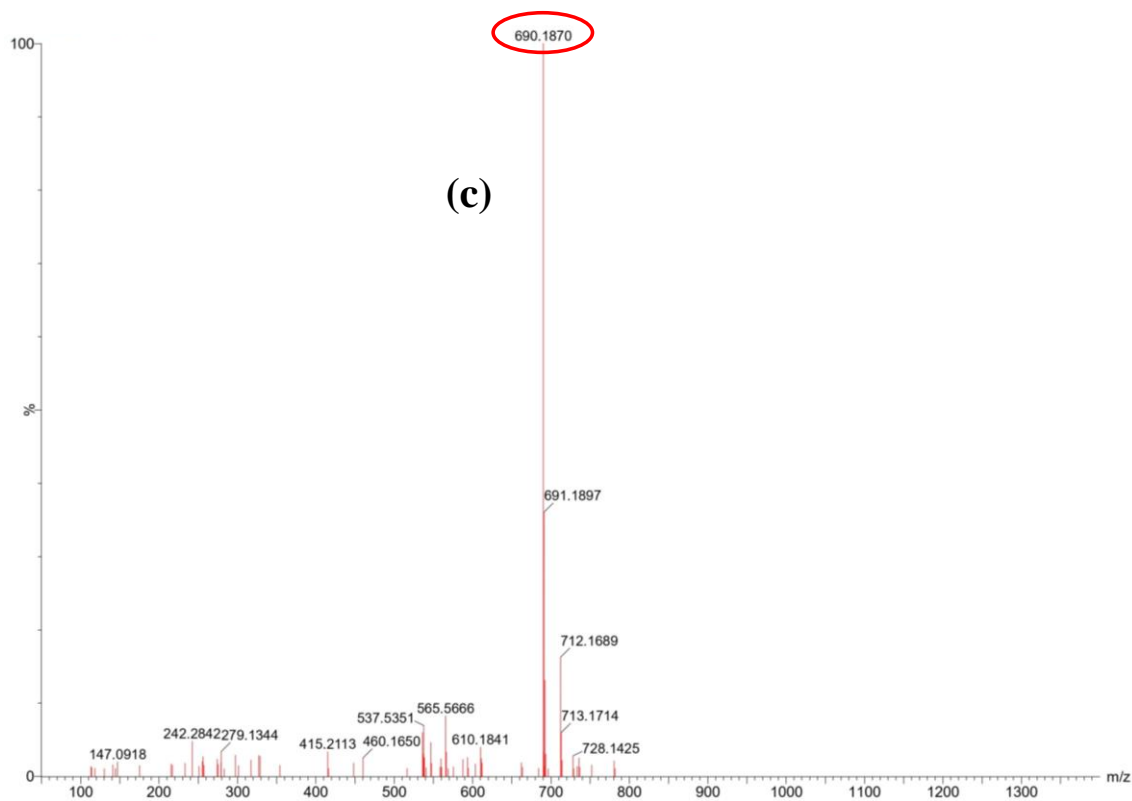

**Fig. S4:** (a)  $^1\text{H}$  NMR ( $\text{CDCl}_3$ ), (b)  $^{13}\text{C}$  NMR ( $\text{CDCl}_3$ ) and (c) ESI-MS spectrum of compound **P6**

### S5. Characterization of compound **L**

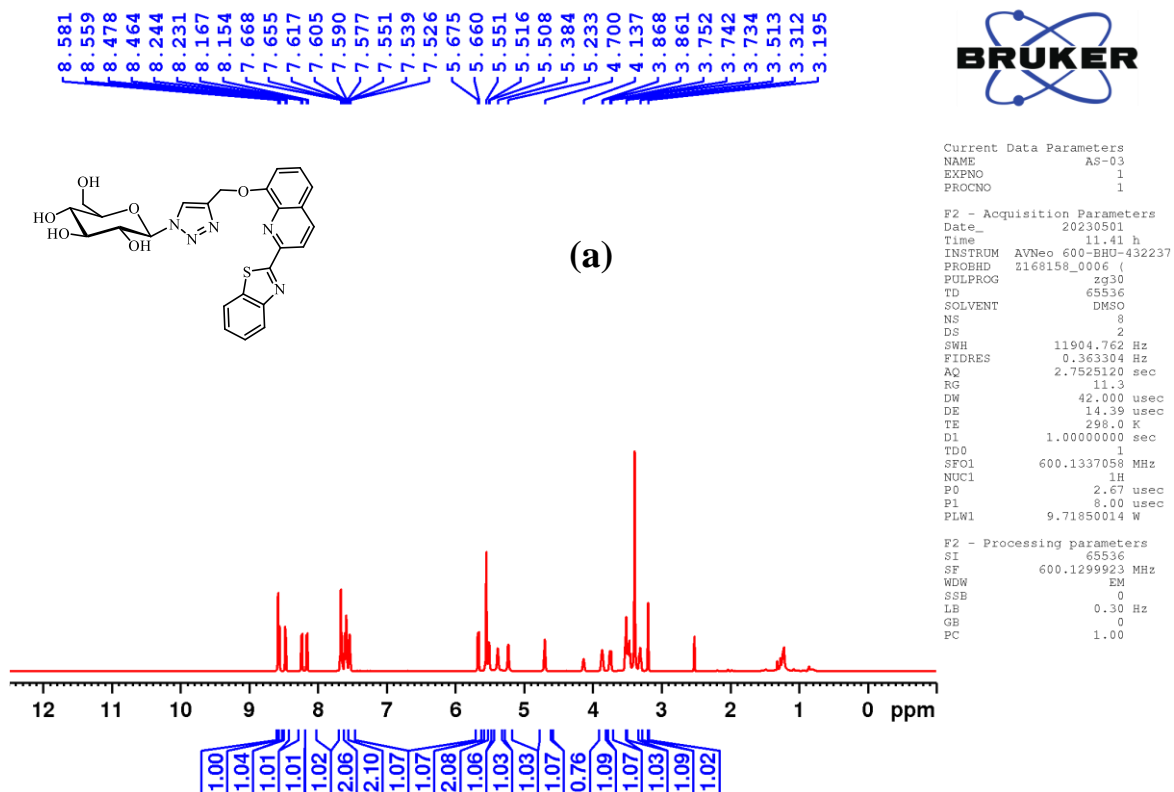

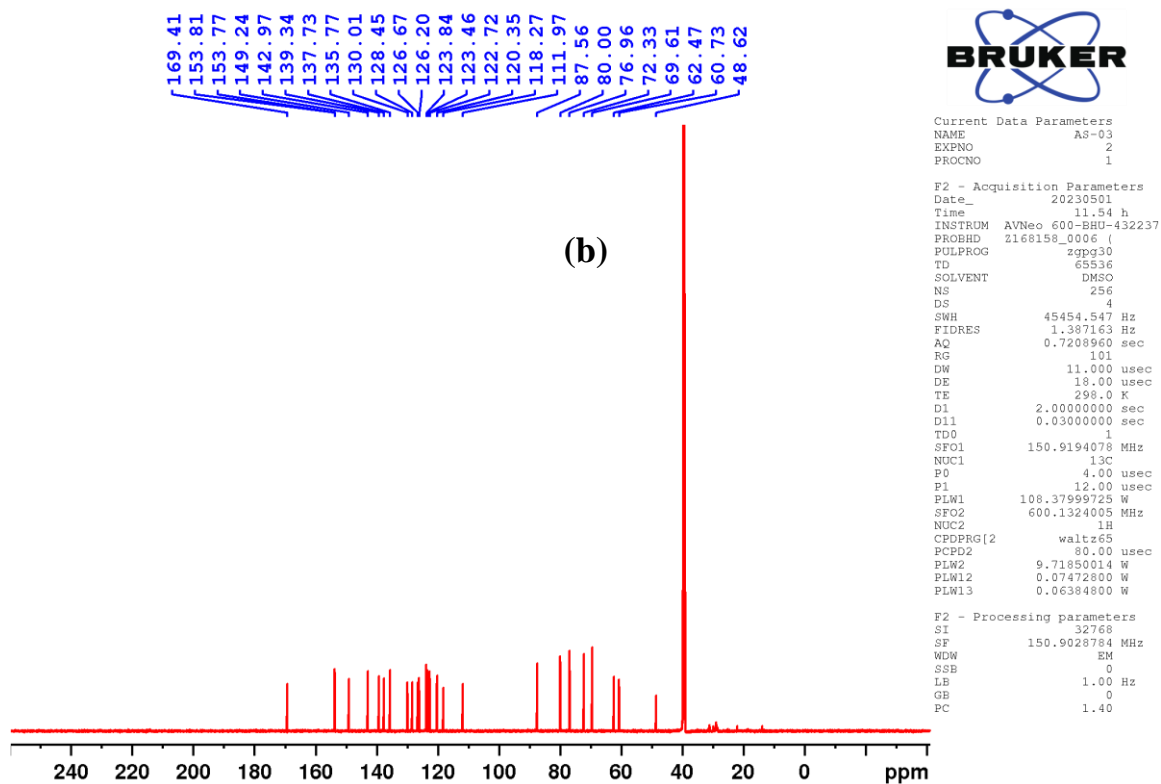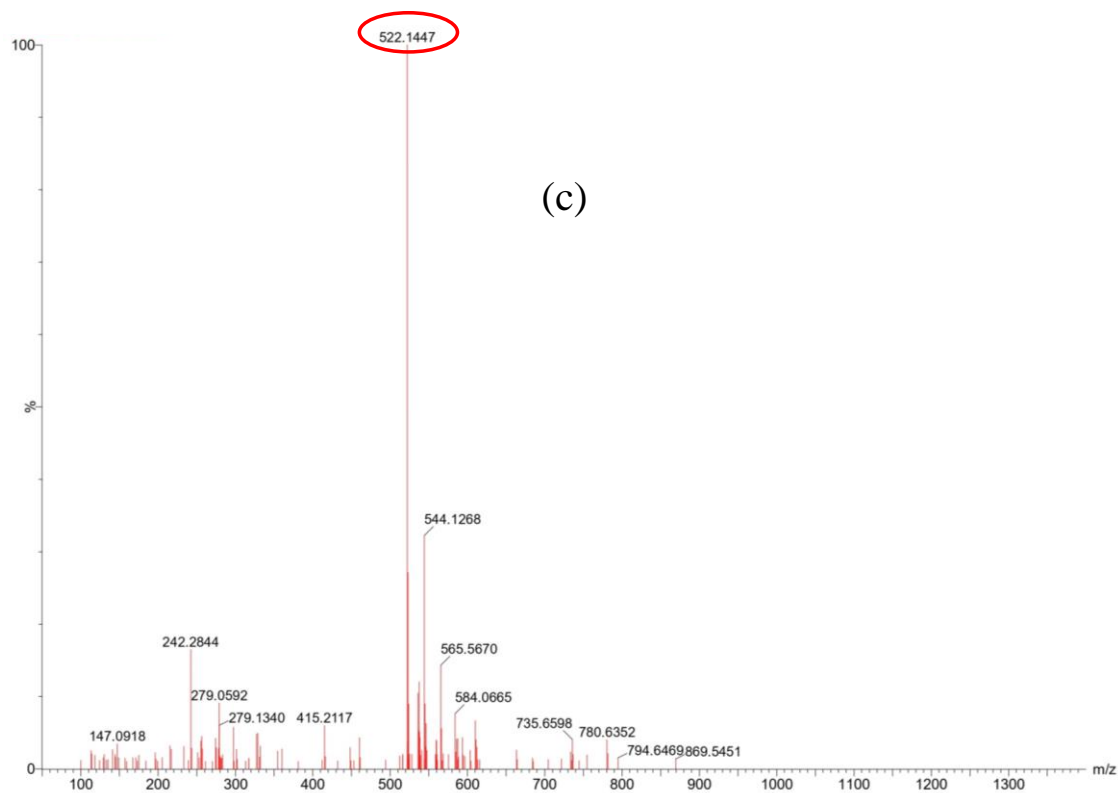

**Fig. S5.** (a)  $^1\text{H}$  NMR (DMSO- $d_6$ ), (b)  $^{13}\text{C}$  NMR (DMS)- $d_6$  and (c) ESI-MS spectrum of compound **L**

## S6. Solubility of probe L in water

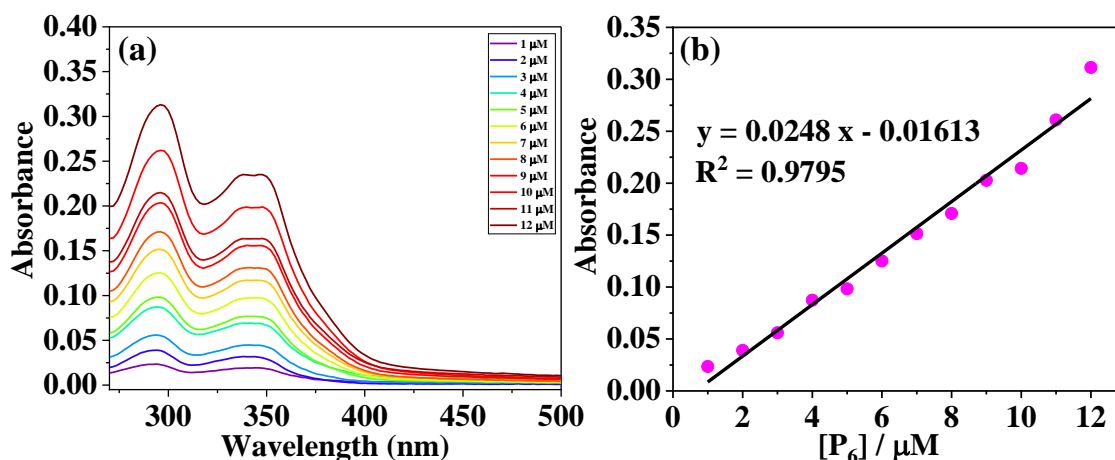

**Fig. S6** (a) UV-Vis spectra of **L** at different concentrations ranging from 1-12  $\mu\text{M}$  in water (b) A plot of absorbance (294 nm) vs. different concentrations of **L** in water.

## S7. Effect of absorbance and Fluorescence on probe L using different metal ions

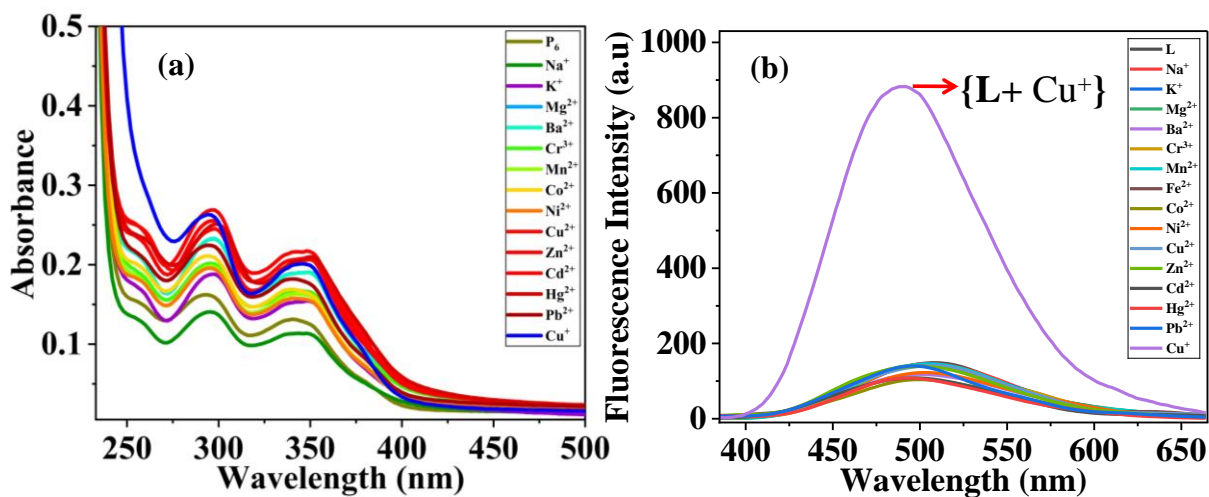

**Fig. S7** (a) Absorbance of **L** (10  $\mu\text{M}$ ) with  $\text{Cu}^+$  (3 equivalent) and other metal ions (10 equivalent) in water (b) fluorescence spectral titration of **L** (10  $\mu\text{M}$ ) with  $\text{Cu}^+$  (3 equivalents) and other different metals (10 equivalents) ( $\lambda_{\text{ex}}=294$  nm) in water.

## S8 Fluorescence spectra of L with different metal ions

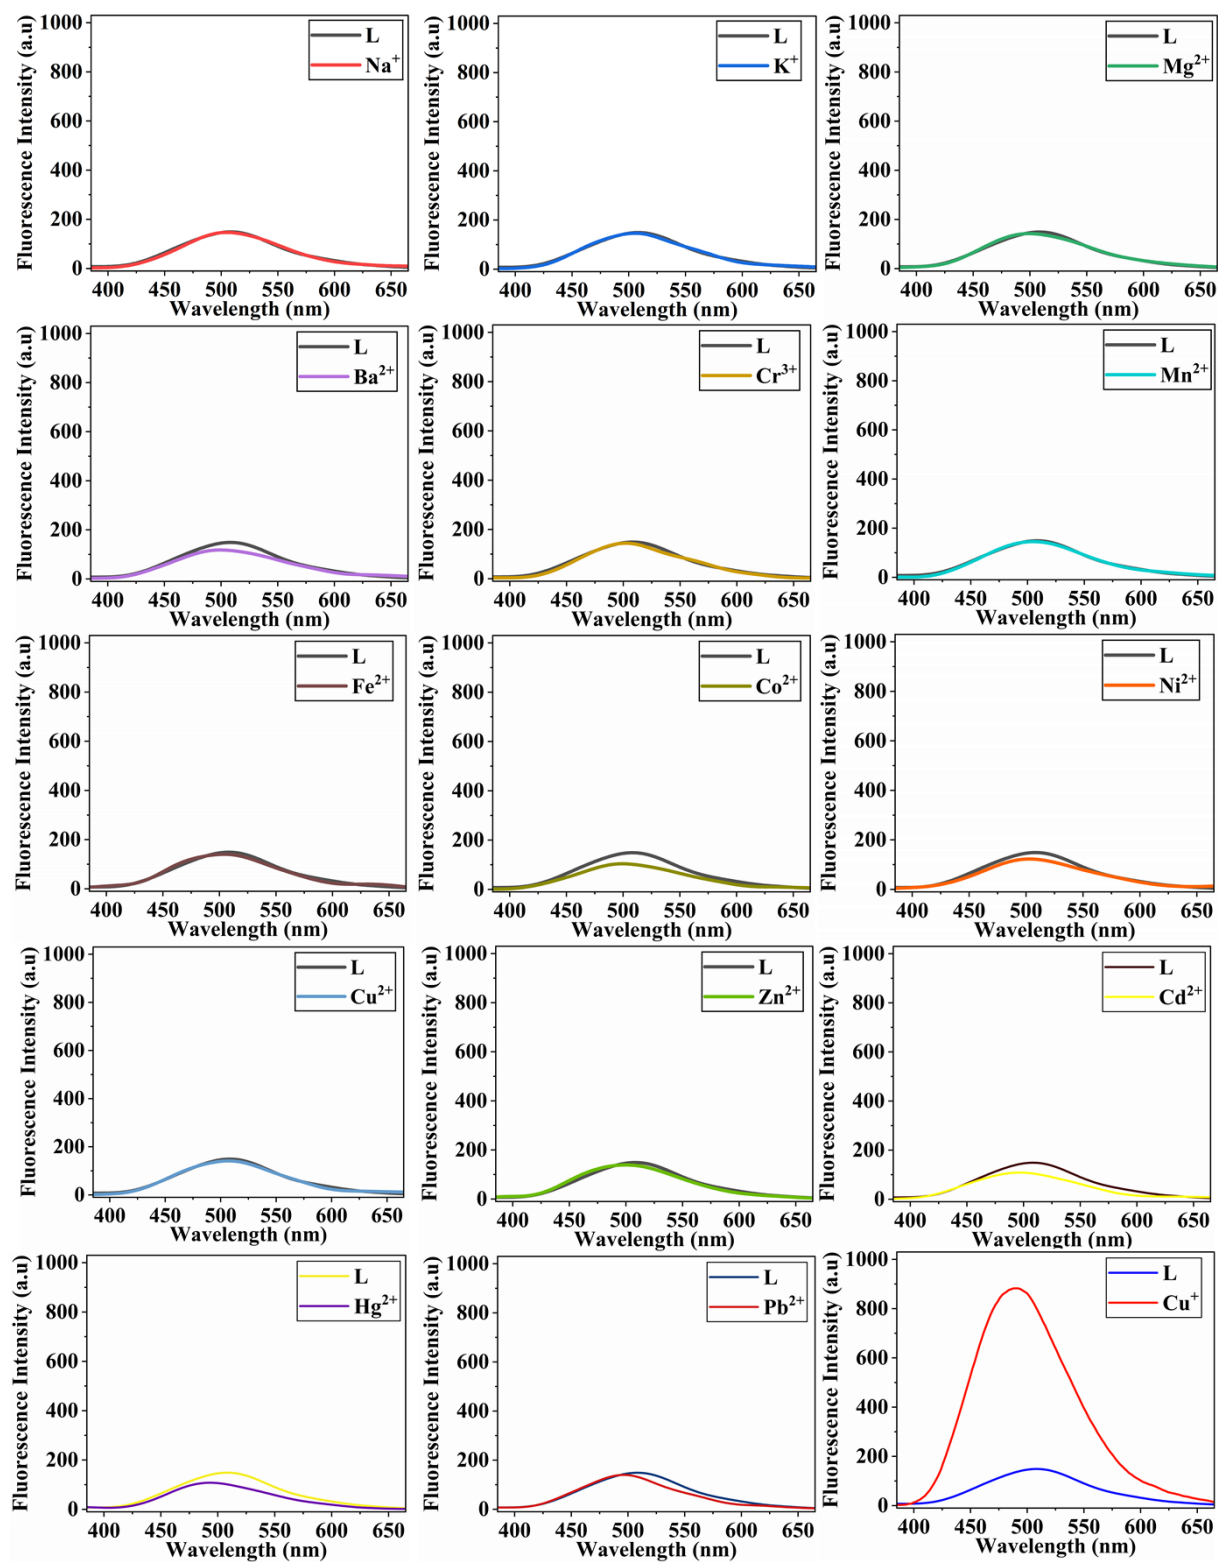

**Fig. S8.** Fluorescence spectra of L (10  $\mu$ M) titrated with various metal ions (10 equivalents) in water.

### S9. Association constant obtained from the fluorescence titration of {L+Cu<sup>+</sup>} complex

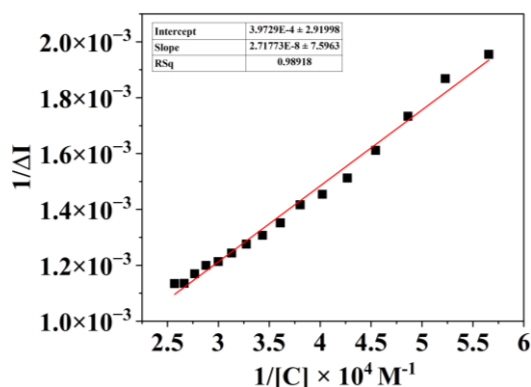

Fig. S9. Binding constant ( $K_a$ ) of Ligand **L** with  $\text{Cu}^+$  concentration in water

### S10. Determination of Limit of Detection (LOD) of $\text{Cu}^+$ by **L**

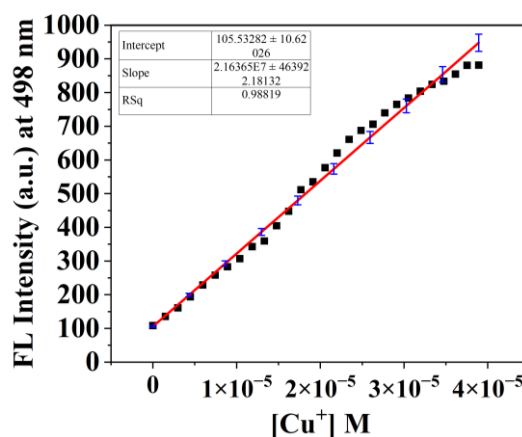

Fig. S 10. Linear fluorescence relationship of Ligand (**L**) with  $\text{Cu}^+$  (3-90  $\mu\text{M}$ ) in water at  $\lambda_{\text{em}}=498 \text{ nm}$

### S11. Fluorescence quantum yield of **L** and {L+ $\text{Cu}^+$ } complex

The quantum yield ( $\Phi$ ) was determined using literature reported method by the following equation.<sup>3</sup>

$$\Phi Y_{\text{sample}} = \Phi Y_{\text{Reference}} \left( \frac{\text{sample gradient}}{\text{reference gradient}} \right) \left( \frac{\text{sample refractive index}}{\text{reference refractive index}} \right)^2$$

where the subscripts R and S denote the reference standard (fluorescein in 0.1 M NaOH) and the synthesized sample **L**, respectively.  $\Phi$  represents the quantum yield, F is the integrated fluorescence emission, A is the absorbance at the excitation wavelength, and n is the refractive index of the solvent. The quantum yield of **L** was calculated using fluorescein as the standard, which has a reported quantum yield of 0.79 in 0.1 M NaOH.

**S12. Table 1:** Comparisons between **L** and the molecular probes reported in the literature.

| Sr. No. | Fluorescent molecular systems                                                       | Ion             | Limit of detection (LOD) | Solvent system                                           | Ref.                                                                 |
|---------|-------------------------------------------------------------------------------------|-----------------|--------------------------|----------------------------------------------------------|----------------------------------------------------------------------|
| 1.      | 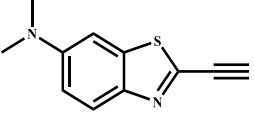   | Cu <sup>+</sup> | N.R                      | PBS buffer (1 mM, pH 7.2)                                | [31] <i>Bioorg. Med. Chem. Lett.</i> , 2012, <b>22</b> , 1747–1749.  |
| 2.      |    | Cu <sup>+</sup> | N.R                      | HEPES buffer (10 mM, pH 7.2)                             | [32] <i>Chem. Commun.</i> , 2014, <b>50</b> , 9835–9838.             |
| 3.      |    | Cu <sup>+</sup> | N.R                      | Tris-HCl buffer/DMF 4:6 v/v pH=7.2                       | [33] <i>Sci. China: Chem.</i> , 2019, <b>62</b> , 465–474.           |
| 4.      |    | Cu <sup>+</sup> | 1.2 × 10 <sup>-9</sup> M | SDS (8 mM) micelles (EDTA 2 μM)                          | [34] <i>J. Mater. Chem. B</i> , 2023, <b>11</b> , 4111-4120          |
| 5.      |   | Cu <sup>+</sup> | N.R                      | HEPES buffer solution (with 50% of acetonitrile, pH 7.2) | [35] <i>Chem. Commun.</i> , 2013, <b>49</b> , 5565–5567.             |
| 6.      |  | Cu <sup>+</sup> | N.R                      | (10 mM HEPES, pH 7.4) containing 1% DMF                  | [36] <i>Sensors and Actuators B</i> , 2018, <b>256</b> , 393–401.    |
| 7.      |  | Cu <sup>+</sup> | N.R                      | Thiourea buffer in methanol                              | [37] <i>Angew. Chem., Int. Ed.</i> , 2021, <b>133</b> , 23332–23337. |
| 8.      |  | Cu <sup>+</sup> | N.R*                     | HEPES buffer (20 mM, pH 7)                               | [38] <i>J. Am. Chem. Soc.</i> 2006, <b>128</b> , 10–11               |
| 9.      |  | Cu <sup>+</sup> | N.R                      | HEPES buffer (50 mM, pH 7.2)                             | [39] <i>J. Am. Chem. Soc.</i> 2010, <b>132</b> , 5938–5939           |

|     |                                                                                     |                 |                         |                                       |                                                                          |
|-----|-------------------------------------------------------------------------------------|-----------------|-------------------------|---------------------------------------|--------------------------------------------------------------------------|
| 10. | 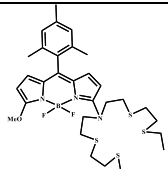   | Cu <sup>+</sup> | N.R                     | HEPES buffer (20 mM, pH 7.0)          | [40]<br><i>J. Am. Chem. Soc.</i> , 2010, <b>132</b> , 1194–1195.         |
| 11. |    | Cu <sup>+</sup> | N.R                     | MOPS/K <sup>+</sup> , (10 mM, pH 7.2) | [41]<br><i>J. Am. Chem. Soc.</i> 2011, <b>133</b> , 15906–15909          |
| 12. |    | Cu <sup>+</sup> | N.R                     | HEPES buffer (20 mM, pH 7.0)          | [42]<br><i>Chem. Commun.</i> , 2011, <b>47</b> , 7146–7148.              |
| 13. |    | Cu <sup>+</sup> | $4.1 \times 10^{-13}$ M | PBS Buffer (25 mM, pH 7.0)            | [43]<br><i>Chem. Commun.</i> , 2012, <b>48</b> , 6247–6249.              |
| 14. |   | Cu <sup>+</sup> | $2.0 \times 10^{-7}$ M  | HEPES Buffer (0.10 M, pH 7.4)         | [44]<br><i>Tetrahedron Lett.</i> , 2012, <b>53</b> , 4473–4475.          |
| 15. |  | Cu <sup>+</sup> | $1.0 \times 10^{-6}$ M  | Water                                 | [45]<br><i>Photochem. Photobiol. Sci.</i> , 2014, <b>13</b> , 1427–1433. |
| 16. |  | Cu <sup>+</sup> | $7.5 \times 10^{-12}$ M | pH 6 buffer (10 mM MES, 100 nM MCL-1) | [46]<br><i>Chem. Sci.</i> , 2016, <b>7</b> , 1468–1473                   |
| 17. |  | Cu <sup>+</sup> | N.R                     | Thiourea-buffered                     | [47]<br><i>ACS Chem. Biol.</i> 2018, <b>13</b> , 1844–1852               |
| 18. |  | Cu <sup>+</sup> | $8.2 \times 10^{-9}$ M  | PBS (20 mM, pH 7.0)                   | [48]<br><i>ACS Sens.</i> , 2019, <b>4</b> , 856–864.                     |
| 19. |  | Cu <sup>+</sup> | $2.0 \times 10^{-8}$ M  | PBS Buffer (10 mM, pH 7.0)            | [49]<br><i>ACS Sens.</i> 2024, <b>9</b> , 1419–1427                      |
| 20. |  | Cu <sup>+</sup> | $1.48 \times 10^{-8}$ M | Water                                 | Present work                                                             |

\*N.R. represents LOD not reported

### S13. Reversibility experiments of L with Cu<sup>+</sup>

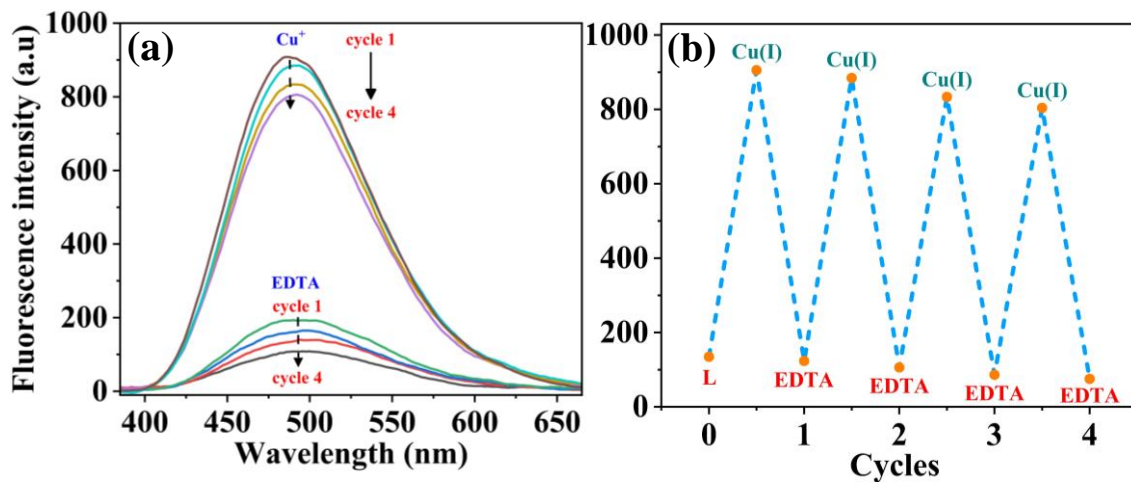

**Fig. S13.** (a) Fluorescence switching plot of **L** ( $n=4$ ) after repeated additions of  $\text{Cu}^+$  followed by EDTA showing the reversibility of **L** (b) Reversible fluorescence up to four cycles of **L** with  $\text{Cu}^+$  ( $n=4$ ).

### S14. Optimized structure of L and {L+Cu<sup>+</sup>}

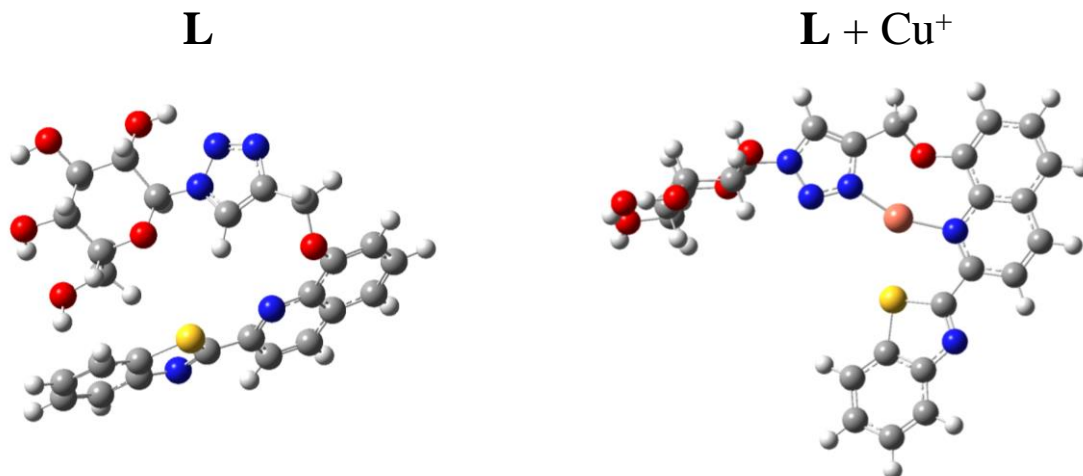

**Fig. S14.** Theoretical optimized structure of **L** and  $\{\text{L}+\text{Cu}^+\}$



**Table S 01. Cartesian coordinates of optimized L**

| Z | Coordinates |           |           | Z  | Coordinates |           |           |
|---|-------------|-----------|-----------|----|-------------|-----------|-----------|
|   | X           | Y         | X         |    | X           | Y         | Z         |
| 6 | -1.98537    | 3.353833  | -0.261477 | 1  | 3.372344    | 2.236552  | 2.968243  |
| 6 | -1.00661    | 2.171346  | -0.364928 | 8  | 3.73345     | 0.667185  | 1.76665   |
| 6 | -2.70633    | 0.505563  | -0.077015 | 6  | 4.331172    | 0.235729  | 0.620983  |
| 6 | -3.75362    | 1.609585  | 0.079694  | 6  | 3.671765    | -0.782799 | -0.135165 |
| 6 | -3.36584    | 2.875512  | -0.684708 | 6  | 5.552688    | 0.706802  | 0.208751  |
| 1 | -0.83092    | 1.969984  | -1.430591 | 6  | 4.298129    | -1.272246 | -1.314017 |
| 1 | -2.03484    | 3.675495  | 0.788766  | 6  | 6.164744    | 0.20606   | -0.959069 |
| 1 | -2.91865    | -0.2876   | 0.646316  | 1  | 6.056358    | 1.465518  | 0.797125  |
| 1 | -3.79111    | 1.881099  | 1.141289  | 6  | 1.836555    | -2.121246 | -0.462175 |
| 1 | -3.32876    | 2.661     | -1.765652 | 6  | 3.597205    | -2.249605 | -2.06335  |
| 8 | -1.43384    | 1.015054  | 0.313662  | 6  | 5.557025    | -0.764079 | -1.708778 |
| 8 | -1.58106    | 4.387103  | -1.116895 | 1  | 7.130978    | 0.599474  | -1.256147 |
| 1 | -0.71984    | 4.695838  | -0.789909 | 6  | 2.366046    | -2.671617 | -1.655199 |
| 8 | -4.30977    | 3.881532  | -0.418257 | 1  | 4.049353    | -2.645151 | -2.967818 |
| 1 | -5.17187    | 3.449971  | -0.508742 | 1  | 6.023559    | -1.148198 | -2.609986 |
| 8 | -5.05787    | 1.203634  | -0.284537 | 1  | 1.784782    | -3.400822 | -2.205018 |
| 1 | -4.9773     | 0.53444   | -0.985887 | 7  | 2.459984    | -1.23089  | 0.274103  |
| 6 | -2.65533    | -0.143205 | -1.465555 | 6  | -1.5634     | -2.823092 | 1.264316  |
| 1 | -2.5479     | 0.598873  | -2.259758 | 6  | -1.5666     | -3.284189 | -0.066098 |
| 1 | -1.79277    | -0.816466 | -1.516747 | 6  | -2.73043    | -3.841811 | -0.609199 |
| 8 | -3.87109    | -0.829472 | -1.740666 | 6  | -3.86153    | -3.930207 | 0.184654  |
| 1 | -3.88814    | -1.640065 | -1.210982 | 6  | -3.84564    | -3.475188 | 1.512856  |
| 7 | 0.280002    | 2.490575  | 0.249584  | 6  | -2.70229    | -2.922509 | 2.064536  |
| 6 | 1.13087     | 1.650662  | 0.87155   | 6  | 0.494617    | -2.516951 | -0.003332 |
| 6 | 2.213338    | 2.439866  | 1.171478  | 1  | -2.72142    | -4.196327 | -1.633951 |
| 1 | 0.926045    | 0.608197  | 1.037411  | 1  | -4.7693     | -4.366286 | -0.218778 |
| 7 | 0.802078    | 3.724581  | 0.164501  | 1  | -4.74296    | -3.557646 | 2.11633   |
| 7 | 1.973661    | 3.697162  | 0.723331  | 1  | -2.69655    | -2.569294 | 3.089759  |
| 6 | 3.467963    | 2.062741  | 1.893646  | 7  | -0.38025    | -3.102033 | -0.752359 |
| 1 | 4.298713    | 2.67443   | 1.529172  | 16 | -0.00823    | -2.137049 | 1.638587  |

**Table S 02. Cartesian coordinates of optimized {L+Cu<sup>+</sup>}**

| Z | Coordinates |          |          | Z | Coordinates |          |          |
|---|-------------|----------|----------|---|-------------|----------|----------|
|   | X           | Y        | X        |   | X           | Y        | Z        |
| 6 | 5.562101    | -0.02528 | -1.00067 | 1 | -2.9532     | -5.07694 | -0.76039 |
| 6 | 5.995367    | 0.53164  | 0.361971 | 6 | -1.90957    | 3.72889  | -0.27104 |
| 6 | 5.645415    | -0.46792 | 1.450803 | 6 | -3.14142    | 3.971464 | 0.36523  |
| 1 | 6.189418    | -0.89828 | -1.23314 | 6 | -3.48848    | 5.273292 | 0.740823 |
| 1 | 6.237744    | -1.37967 | 1.268324 | 6 | -2.60227    | 6.296967 | 0.471793 |
| 1 | 5.445535    | 1.467594 | 0.551425 | 6 | -1.37781    | 6.042246 | -0.16445 |

|   |          |          |          |    |          |          |          |
|---|----------|----------|----------|----|----------|----------|----------|
| 8 | 4.181188 | -0.40246 | -0.97981 | 6  | -1.0156  | 4.760623 | -0.54255 |
| 7 | 2.448804 | -1.65578 | -0.1371  | 6  | -3.34578 | 1.791197 | 0.1287   |
| 6 | 1.884187 | -2.86218 | -0.37644 | 1  | -4.43817 | 5.450675 | 1.231709 |
| 6 | 0.538986 | -2.62192 | -0.35295 | 1  | -2.85293 | 7.313189 | 0.754403 |
| 1 | 2.466057 | -3.75625 | -0.53041 | 1  | -0.70085 | 6.865542 | -0.36456 |
| 7 | 1.541046 | -0.71116 | 0.025751 | 1  | -0.06841 | 4.570474 | -1.03385 |
| 7 | 0.381121 | -1.28938 | -0.10299 | 16 | -1.76652 | 2.024776 | -0.62308 |
| 6 | -0.65361 | -3.52194 | -0.48799 | 7  | -3.9263  | 2.85369  | 0.567433 |
| 1 | -0.46561 | -4.31152 | -1.22116 | 6  | 5.668794 | 0.995651 | -2.12208 |
| 1 | -0.89935 | -3.98918 | 0.472147 | 1  | 5.39336  | 0.52339  | -3.07235 |
| 8 | -1.73786 | -2.69349 | -0.90615 | 1  | 4.95608  | 1.806235 | -1.9206  |
| 6 | -3.01218 | -2.96696 | -0.48057 | 8  | 7.006563 | 1.464782 | -2.13758 |
| 6 | -3.79576 | -1.83664 | -0.11099 | 1  | 7.104668 | 2.141468 | -2.8162  |
| 6 | -5.15417 | -2.03193 | 0.224956 | 8  | 7.385465 | 0.718394 | 0.446237 |
| 6 | -4.89965 | -4.41089 | -0.08417 | 1  | 7.654589 | 1.248697 | -0.32041 |
| 6 | -3.9713  | 0.464808 | 0.183237 | 8  | 5.895575 | 0.031964 | 2.741255 |
| 6 | -5.91662 | -0.88036 | 0.544079 | 1  | 6.818478 | 0.320539 | 2.761981 |
| 6 | -5.68977 | -3.34104 | 0.238288 | 8  | 3.857349 | -1.85995 | 2.304259 |
| 1 | -5.30859 | -5.41459 | -0.07403 | 1  | 4.268287 | -1.62269 | 3.147748 |
| 6 | -5.34208 | 0.356025 | 0.506192 | 6  | 3.869172 | -1.34436 | 0.000353 |
| 1 | -6.96362 | -0.99516 | 0.80551  | 1  | 4.397133 | -2.29517 | -0.15749 |
| 1 | -6.73117 | -3.4801  | 0.506806 | 6  | 4.174901 | -0.83197 | 1.401562 |
| 1 | -5.8892  | 1.263882 | 0.723357 | 1  | 3.572544 | 0.069076 | 1.580997 |
| 7 | -3.21576 | -0.59286 | -0.08251 | 29 | -1.34828 | -0.60671 | -0.17057 |
| 6 | -3.55239 | -4.22419 | -0.46138 |    |          |          |          |

### S15. Effect of pH on the fluorescence emission of L and {L+Cu<sup>+</sup>}

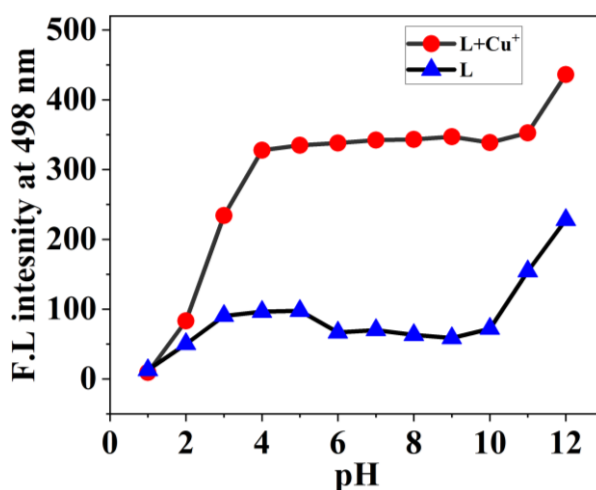

**Fig. S15.** Fluorescence response of (a) Free L (10  $\mu$ M), (b) in the presence of Cu<sup>+</sup> (1 equiv.), and (c) fluorescence emission at 498 vs. pH range from 1-12.

## References:

- 1 S. Areti, S. Bandaru, R. Teotia and C. P. Rao, Water-Soluble 8-Hydroxyquinoline Conjugate of Amino-Glucose As Receptor for  $\text{La}^{3+}$  in HEPES Buffer, on Whatman Cellulose Paper and in Living Cells, *Anal. Chem.*, 2015, **87**, 12348–12354.
- 2 N. Drillaud, E. Banaszak-Leonard, I. Pezron and C. Len, Synthesis and Evaluation of a Photochromic Surfactant for Organic Reactions in Aqueous Media, *J. Org. Chem.*, 2012, **77**, 9553–9561.
3. J. Hu and C.-y. Zhang, Quantum Yield Limits for the Detection of Single-Molecule Fluorescence Enhancement by a Gold Nanorod, *Anal. Chem.*, 2013, **85**, 2000–2004.
